# Supplementary material for: Silica gel-mediated chemical degradation of dimeric pyranonaphthoquinones into their monomeric units
Source: Royal Society of Chemistry journal article supplement (doi:10.1039/d3nj01957h), 2023-01-01
Supplement: d3nj01957h1.pdf [file d3nj01957h1.pdf]

## *Supplementary Information*

# **Silica gel-mediated chemical degradation of dimeric pyranonaphthoquinones into their monomeric units**

Chiharu Ozakai, Kei Kitamura,\* and Hiroto Kaku\*

*Faculty of Pharmaceutical Sciences, Tokushima Bunri University, Yamashiro-cho, Tokushima, 770-8514*

### **Table of Contents**

|                                                        |     |
|--------------------------------------------------------|-----|
| 1. General .....                                       | S2  |
| 2. Screening and optimization.....                     | S3  |
| 3. Experimental procedure .....                        | S6  |
| 4. Mechanistic study .....                             | S18 |
| 5. UV–Vis spectra.....                                 | S19 |
| 6. <sup>1</sup> H and <sup>13</sup> C NMR spectra..... | S21 |
| 7. Reference .....                                     | S25 |

## 1. General

Infrared (IR) spectra were measured on a JASCO FT/IR-4200 spectrophotometer. Ultraviolet–Visible (UV–Vis) spectra were measured on a JASCO V-650 spectrophotometer. Melting points (Mp) were determined on a Büchi B-545 apparatus, and were uncorrected. Optical rotations ( $[\alpha]_D$ ) were measured with a JASCO P-2300 polarimeter. High-resolution mass spectra (HRMS) were recorded on a JEOL JMS-700 (EI/CI) or a JEOL JMS-S3000 Spiral TOF mass spectrometers (MALDI). For column chromatography, silica gel 60 N (Spherical, 63–210  $\mu\text{m}$ , Kanto Chemical Co., Inc.) was used. For thin-layer chromatography (TLC) analysis, Merck precoated silica gel plates 60 F<sub>254</sub> were used. Preparative TLC (PTLC) was performed with Merck precoated silica gel plates (60F<sub>254</sub>). <sup>1</sup>H NMR spectra were recorded on a Bruker AVANCE-III (500 MHz) spectrometer; chemical shifts were referenced to tetramethylsilane as an internal standard and the residual solvent signal (CDCl<sub>3</sub>:  $\delta_{\text{H}}$  7.26; methanol-*d*<sub>4</sub>:  $\delta_{\text{H}}$  3.31). <sup>13</sup>C NMR spectra were recorded with a Bruker AVANCE-III (125 MHz) spectrometer; chemical shifts were referenced to the residual solvent signal (CDCl<sub>3</sub>:  $\delta_{\text{C}}$  77.0; methanol-*d*<sub>4</sub>:  $\delta_{\text{C}}$  49.3).

## 2. Screening and optimization

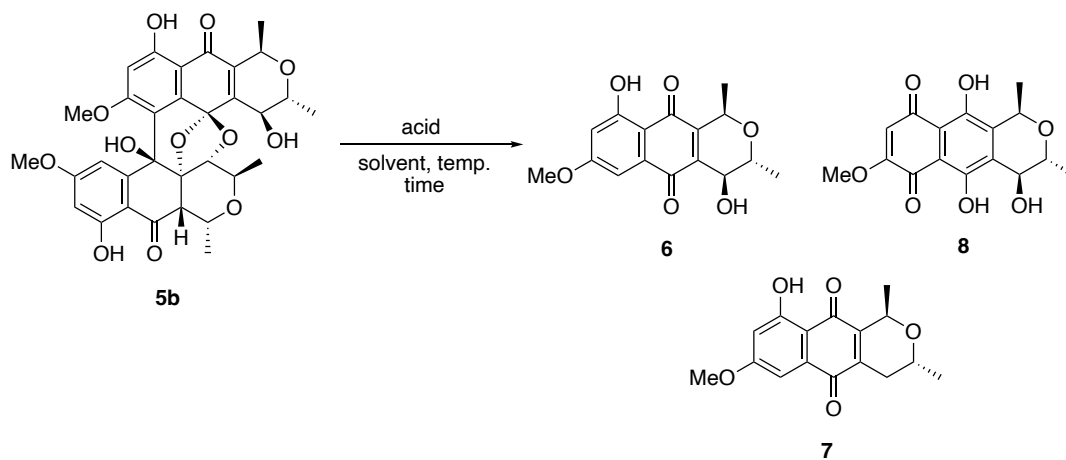

Table S1. Screening of acid.

| entry | acid (equiv)                         | solvent | temp. (°C) | time (h) | result        |
|-------|--------------------------------------|---------|------------|----------|---------------|
| 1     | alumina (pH 4.5) <sup>a</sup>        | MeOH    | 50         | 6        | decomposition |
| 2     | montmorillonite K10 <sup>a</sup>     | MeOH    | 50         | 6        | decomposition |
| 3     | amberlite IR-120B <sup>a</sup>       | MeOH    | reflux     | 24       | decomposition |
| 4     | AcOH <sup>b</sup>                    | —       | reflux     | 24       | decomposition |
| 5     | TsOH·H <sub>2</sub> O (45)           | MeOH    | reflux     | 15       | decomposition |
| 6     | H <sub>2</sub> SO <sub>4</sub> (120) | MeOH    | reflux     | 8        | decomposition |
| 7     | TsOH·H <sub>2</sub> O (45)           | toluene | 80         | 15       | decomposition |
| 8     | H <sub>2</sub> SO <sub>4</sub> (120) | toluene | 80         | 8        | decomposition |

<sup>a</sup> 54 g/mmol of solid acid was used. <sup>b</sup> AcOH was used as a solvent (2.0 mM).

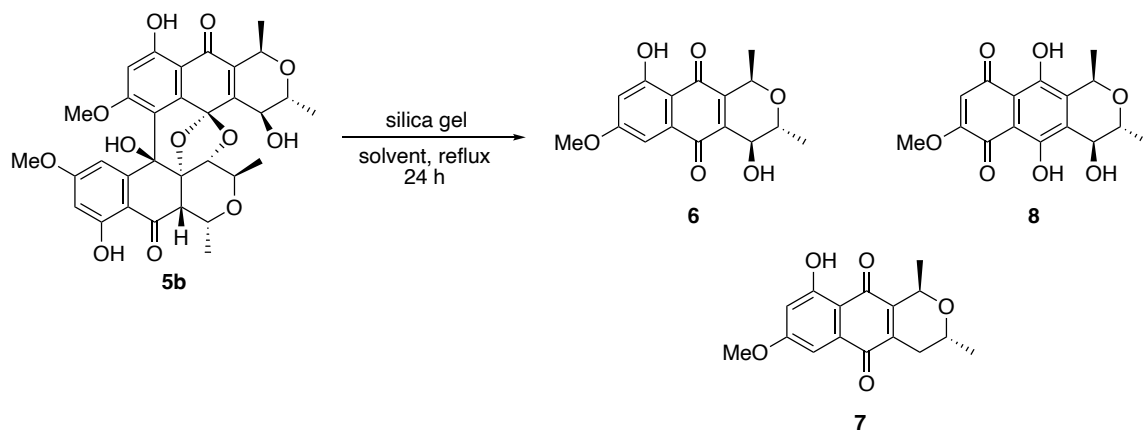

Table S2. Screening of solvent<sup>a</sup>.

| entry | silica gel | solvent                     | yield (%) |    |    | recovery (%)<br>(5a:5b) |
|-------|------------|-----------------------------|-----------|----|----|-------------------------|
|       |            |                             | 6         | 7  | 8  |                         |
| 1     | silica gel | MeOH                        | 21        | 21 | 28 | 0                       |
| 2     | silica gel | —                           | 0         | 0  | 0  | 56<br>(1:1:1)           |
| 3     | —          | MeOH                        | 0         | 0  | 4  | 71<br>(1:2:0)           |
| 4     | silica gel | toluene                     | 0         | 0  | 0  | 83<br>(1:2:6)           |
| 5     | silica gel | chlorobenzene               | 0         | 0  | 0  | 67<br>(1:1:5)           |
| 6     | silica gel | EtOAc                       | 0         | 0  | 0  | 88<br>(1:6:1)           |
| 7     | silica gel | <i>n</i> -PrOH              | 9         | 11 | 6  | 35<br>(2:5:1)           |
| 8     | silica gel | MeOH/H <sub>2</sub> O = 1/1 | 9         | 6  | 46 | 0                       |

<sup>a</sup> The reaction was performed using silica gel (54 g/mmol) in solvent (2.0 mM).

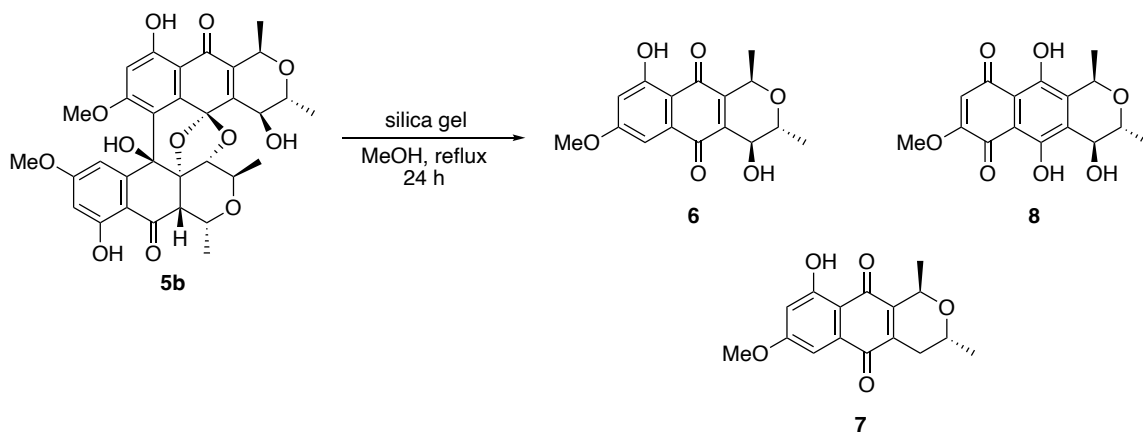

Table S3. Screening of silica gel<sup>a</sup>.

| entry | silica gel                         | manufacturer                             | yield (%) |          |          | recovery (%)<br>( <b>5a:5b</b> ) |
|-------|------------------------------------|------------------------------------------|-----------|----------|----------|----------------------------------|
|       |                                    |                                          | <b>6</b>  | <b>7</b> | <b>8</b> |                                  |
| 1     | silica gel<br>(pH 7, 63–210 μm)    | Kanto Chemical<br>Co., Inc.              | 21        | 21       | 28       | 0                                |
| 2     | silica gel<br>(pH 7, 40–50 μm)     | Kanto Chemical<br>Co., Inc.              | 12        | 14       | 29       | 0                                |
| 3     | silica gel<br>(pH 7, 64–210 μm)    | FUJIFILM Wako<br>Pure Chemical Co., Inc. | 22        | 15       | 24       | 0                                |
| 4     | silica gel<br>(pH 6, 63–210 μm)    | Kanto Chemical<br>Co., Inc.              | 0         | 0        | 0        | 29<br>(1:1.5)                    |
| 5     | oxalated silica gel <sup>[1]</sup> | —                                        | 0         | 2        | 0        | 37<br>(1:1.6)                    |

<sup>a</sup> The reaction was performed using silica gel (54 g/mmol) in methanol (2.0 mM).

### 3. Experimental procedure

#### 3-1. Silica gel-induced degradation of **5b**

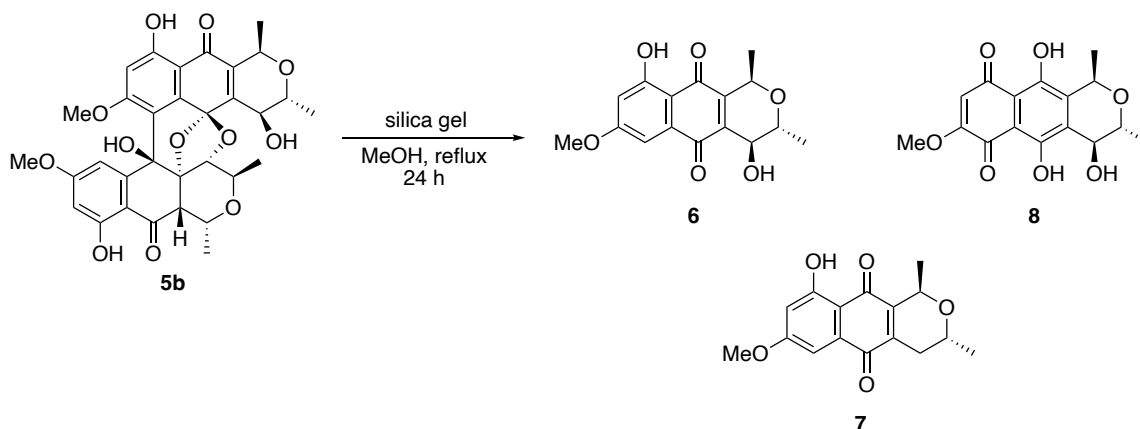

To a solution of compound **5b** (43.2 mg, 71.0  $\mu\text{mol}$ ) in MeOH (36 mL) was added silica gel (3.84 g, dried with a heat gun under vacuum). After stirring for 24 h under reflux, the suspension was filtered through a Celite<sup>®</sup> pad, and washed with EtOAc. The filtrate was concentrated and purified by silica gel column chromatography (*n*-hexane/EtOAc = 5/1  $\rightarrow$  3/1  $\rightarrow$  1/1) to afford pyranonaphthoquinones **6** (9.1 mg, 21%) as yellow solids, **7** (8.5 mg, 21%) as yellow solids, and **8** (12.7 mg, 28%) as red solids.

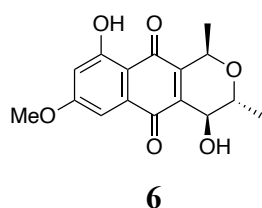

$R_f$  0.61 (*n*-hexane/EtOAc = 1/1);

$[\alpha]_D^{21} -34.2$  (*c* 0.50,  $\text{CHCl}_3$ );

IR (ATR) 3511, 2981, 2920, 2855, 1635, 1610, 1568, 1302, 1263, 1206, 1145, 1107, 1081, 1062, 1044, 985, 847, 787, 752, 721, 620  $\text{cm}^{-1}$ ;

$^1\text{H}$  NMR ( $\text{CDCl}_3$ , 500 MHz)  $\delta$  1.41 (d, 3H,  $J = 6.2$  Hz), 1.62 (d, 3H,  $J = 6.8$  Hz), 3.82 (d, 1H,  $J = 2.2$  Hz), 3.87 (dq, 1H,  $J = 8.0$  Hz, 6.2 Hz), 3.91 (s, 3H), 4.44 (brd, 1H,  $J = 8.0$  Hz), 4.92 (brq, 1H,  $J = 6.8$  Hz), 6.65 (d, 1H,  $J = 2.5$  Hz), 7.17 (d, 1H,  $J = 2.5$  Hz), 12.16 (s, 1H);

$^{13}\text{C}$  NMR ( $\text{CDCl}_3$ , 125 MHz)  $\delta$  18.6, 19.2, 56.1, 67.16, 67.17, 67.8, 106.4, 108.5, 109.4, 133.2, 141.2, 148.5, 164.6, 166.2, 185.4, 186.6;

HRMS (MALDI) calcd for  $\text{C}_{16}\text{H}_{16}\text{O}_6$   $[\text{M}]^-$   $m/z$  304.0941; found  $m/z$  304.0950;

Mp 128–129 °C.

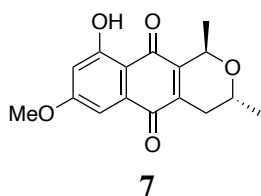

$R_f$  0.81 ( $n$ -hexane/EtOAc = 1/1);

$[\alpha]_D^{20} +53.2$  ( $c$  0.50,  $\text{CHCl}_3$ );

IR (ATR) 3074, 2975, 2930, 2896, 1645, 1608, 1383, 1326, 1293, 1266, 1252, 1203, 1147, 1140, 1100, 1054, 991, 842, 821, 789, 741, 614  $\text{cm}^{-1}$ ;

$^1\text{H}$  NMR ( $\text{CDCl}_3$ , 500 MHz)  $\delta$  1.35 (d, 3H,  $J = 6.2$  Hz), 1.56 (d, 3H,  $J = 6.9$  Hz), 2.22 (ddd, 1H,  $J = 2.1$  Hz, 10.2 Hz, 19.3 Hz), 2.72 (dd, 1H,  $J = 3.3$  Hz, 19.3 Hz), 3.90 (s, 3H), 4.00 (ddq, 1H,  $J = 3.3$  Hz, 10.2 Hz, 6.2 Hz), 5.00 (dq, 1H,  $J = 2.1$  Hz, 6.9 Hz), 6.63 (d, 1H,  $J = 2.5$  Hz), 7.18 (d, 1H,  $J = 2.5$  Hz), 12.27 (s, 1H);

$^{13}\text{C}$  NMR ( $\text{CDCl}_3$ , 125 MHz)  $\delta$  19.9, 21.5, 29.9, 56.0, 62.5, 67.0, 106.1, 107.8, 109.4, 133.3, 142.0, 146.8, 164.4, 165.9, 183.3, 186.8;

HRMS (MALDI) calcd for  $\text{C}_{16}\text{H}_{16}\text{O}_5$   $[\text{M}]^-$   $m/z$  288.0992; found  $m/z$  288.0993;

Mp 151–152 °C.

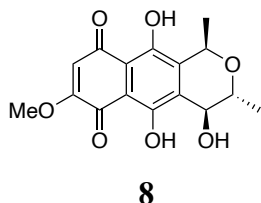

$R_f$  0.29 ( $n$ -hexane/EtOAc = 1/1);

$[\alpha]_D^{21} +14.3$  ( $c$  0.50,  $\text{CHCl}_3$ );

IR (ATR) 3592, 2981, 2919, 2849, 1600, 1568, 1464, 1427, 1371, 1352, 1281, 1249, 1208, 1107, 1070, 1053, 1030, 958, 854, 792, 742, 596  $\text{cm}^{-1}$ ;

$^1\text{H}$  NMR ( $\text{CDCl}_3$ , 500 MHz)  $\delta$  1.46 (d, 3H,  $J = 6.8$  Hz), 1.68 (d, 3H,  $J = 6.8$  Hz), 3.80 (d, 1H,  $J = 2.6$  Hz), 3.97 (s, 3H), 4.00 (dq, 1H,  $J = 7.9$  Hz, 6.8 Hz), 4.61 (dd, 1H,  $J = 2.6$  Hz, 7.9 Hz), 5.11 (q, 1H,  $J = 6.8$  Hz), 6.22 (s, 1H), 12.99 (s, 1H), 13.05 (s, 1H);

$^{13}\text{C}$  NMR ( $\text{CDCl}_3$ , 125 MHz)  $\delta$  18.3, 18.8, 56.9, 67.3, 67.7, 67.8, 108.8, 110.1, 110.3, 135.2, 144.0, 156.3, 159.9, 160.7, 179.8, 185.8;

HRMS (EI) calcd for  $\text{C}_{16}\text{H}_{16}\text{O}_7$   $[\text{M}]^+$   $m/z$  320.0896; found  $m/z$  320.0893;

Mp 141–142 °C.

### 3-2. Silica gel-induced degradation of **5a**

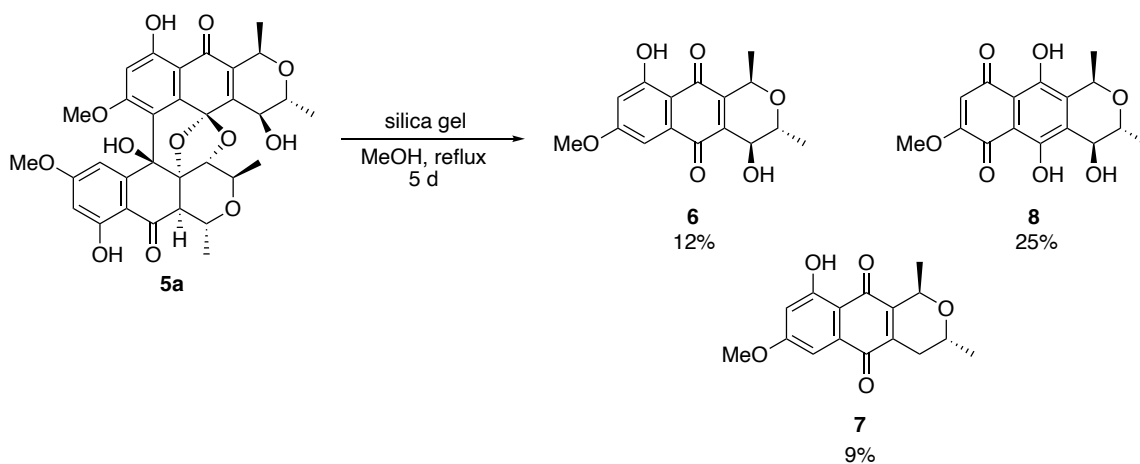



### 3-3. Silica gel-promoted isomerization of uroleuconaphin B<sub>2</sub> (**S1**) to uroleuconaphin B<sub>1</sub> (**S2**)

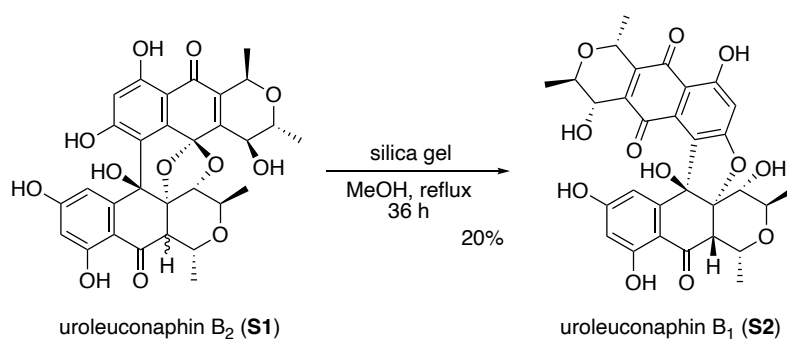

Yellow pigment **S1** (15.3 mg, 26.4  $\mu\text{mol}$ ) was dissolved in EtOAc, which was charged with silica gel (418 mg). The mixture was concentrated under reduced pressure, and the residue was suspended in MeOH (15 mL). After stirring for 36 h under reflux, the suspension was filtered through a Celite<sup>®</sup> pad and was washed with EtOAc. The filtrate was concentrated and purified by silica gel chromatography ( $\text{CHCl}_3/\text{MeOH} = 40/1 \rightarrow 10/1$ ) to afford the red pigment **S2** (3.0 mg, 20%).

### 3-4. Silica gel-induced regiospecific dimerization of **6**

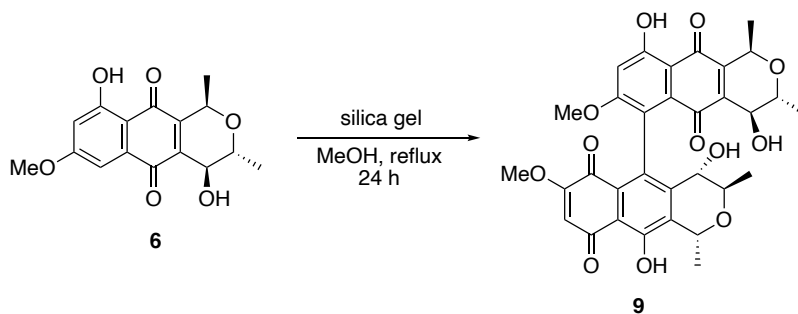

To a solution of compound **6** (6.3 mg, 0.021 mmol) in MeOH (5 mL) was added silica gel (1.1 g, dried with a heat gun under vacuum). After stirring for 24 h under reflux, the suspension was filtered through a Celite® pad and was washed with EtOAc. The filtrate was concentrated and purified by silica gel chromatography (*n*-hexane/EtOAc = 5/1 → 2/1 → 1/1) to afford bisquinone **9** (1.5 mg, 24%) as a 1:1 mixture of atropisomers, and starting material **6** (1.7 mg, 27%) was recovered. The atropisomers of **9** were separated by preparative TLC (*n*-hexane/EtOAc = 2/1×2).

The axial chirality of each diastereomer was determined as follows: We previously reported the strong acid-promoted conversion of uroleuconaphin A<sub>1</sub> (**1**)<sup>[2]</sup> to viridaphins **2** and **S4**, along with **S6** (Scheme S1). The absolute stereochemistry of the axis in **S6** was determined by X-ray analysis after bis-MOM protection.<sup>[3]</sup> Under these conditions, **S7** derived from **S2** was methylated by TMSCHN<sub>2</sub> to obtain **9a**. The spectroscopic data of **9a** was in good agreement with the less polar diastereomer of **9**. The more polar diastereomer of **9** was then assigned as **9b**.

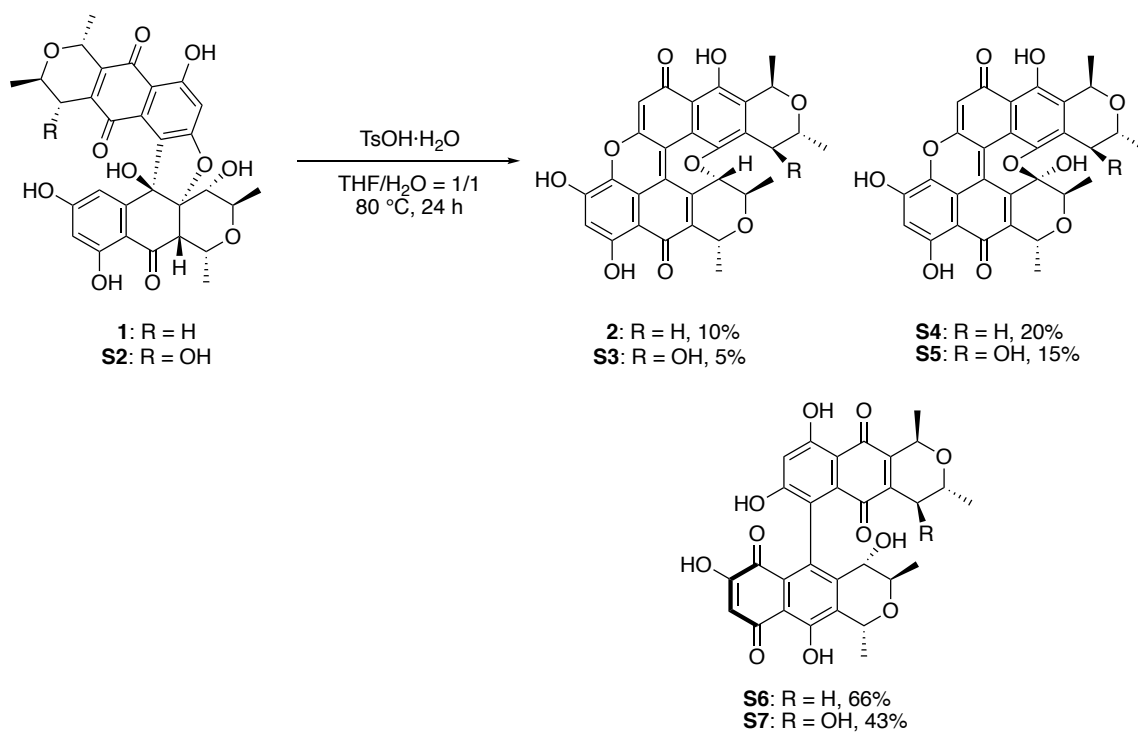

Scheme S1. Acid-promoted chemical conversion of pigments **1** and **S2**.

## Methylation of biaryl compound **S7**

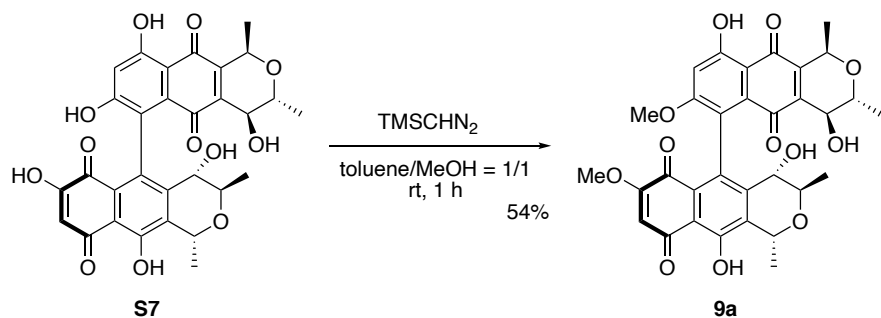

To a solution of biaryl compound **S7** (3.8 mg, 6.6  $\mu\text{mol}$ ) in toluene/MeOH (0.3 mL/0.3 mL) was added trimethylsilyldiazomethane (0.6 M in *n*-hexane, 385  $\mu\text{L}$ , 231  $\mu\text{mol}$ ) at room temperature. After stirring for 15 h, the reaction was quenched by adding AcOH aqueous at this temperature. The products were extracted with EtOAc ( $\times 3$ ), and the combined organic extracts were washed with brine, dried over  $\text{MgSO}_4$ . Concentration and purification by silica gel column chromatography (*n*-hexane/EtOAc = 2/1) afforded compound **9a** (2.2 mg, 54%) as an orange solid.

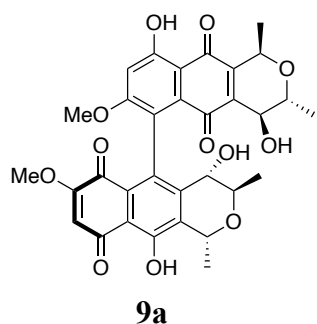

$R_f$  0.23 (*n*-hexane/EtOAc = 1/1 $\times 2$ );

$[\alpha]_D^{21} +57.6$  (*c* 0.09,  $\text{CHCl}_3$ );

IR (ATR) 3522, 2963, 2928, 2853, 1640, 1609, 1381, 1261, 1232, 1206, 1114, 1084, 1029, 799, 780, 760, 473, 444, 412  $\text{cm}^{-1}$ ;

$^1\text{H NMR}$  ( $\text{CDCl}_3$ , 500 MHz)  $\delta$  1.34 (d, 3H,  $J = 6.2$  Hz), 1.42 (d, 3H,  $J = 6.0$  Hz), 1.61 (d, 3H,  $J = 6.8$  Hz), 1.62 (d, 3H,  $J = 6.8$  Hz), 3.46 (d, 1H,  $J = 2.4$  Hz), 3.80 (s, 3H), 3.81–3.86 (m, 5H), 3.89–3.92 (m, 1H), 4.26 (brd, 1H,  $J = 8.0$  Hz), 4.47 (brd, 1H,  $J = 8.0$  Hz), 4.91 (q, 1H,  $J = 6.8$  Hz), 4.93 (q, 1H,  $J = 6.8$  Hz), 6.75 (s, 1H), 7.33 (s, 1H), 12.06 (s, 1H), 12.91 (s, 1H);

$^{13}\text{C}$  NMR ( $\text{CDCl}_3$ , 125 MHz)  $\delta$  18.57, 18.58, 19.0, 19.2, 56.5, 56.6, 66.9, 67.1, 67.2, 67.3, 67.5, 67.8, 103.1, 104.5, 109.7, 110.2, 117.0, 119.4, 130.4, 132.2, 141.1, 141.9, 147.2, 148.1, 160.4, 163.4, 164.3, 165.4, 185.5, 185.6, 187.1, 187.2;

HRMS (MALDI) calcd for  $\text{C}_{32}\text{H}_{30}\text{O}_{12}\text{Na}$   $[\text{M}+\text{Na}]^+$   $m/z$  629.1630; found  $m/z$  629.1642;

Mp 66.8–67.0  $^\circ\text{C}$ .

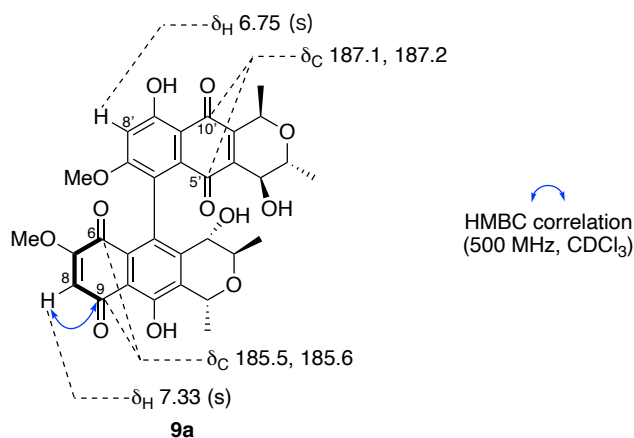

Figure S1. Key HMBC correlation of **9a**

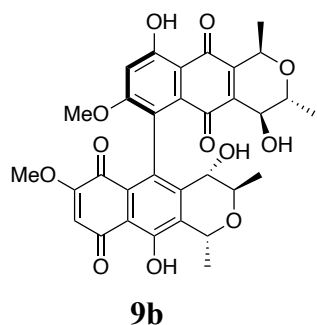

$R_f$  0.18 ( $n$ -hexane/EtOAc = 1/1 $\times$ 2);

$[\alpha]_{\text{D}}^{22}$   $-282$  ( $c$  0.07,  $\text{CHCl}_3$ );

IR (ATR) 3522, 2930, 2855, 1642, 1609, 1381, 1361, 1311, 1291, 1269, 1231, 1114, 1081, 1036, 794, 755, 432  $\text{cm}^{-1}$ ;

$^1\text{H}$  NMR ( $\text{CDCl}_3$ , 500 MHz)  $\delta$  1.34 (d, 3H,  $J$  = 6.0 Hz), 1.43 (d, 3H,  $J$  = 6.0 Hz), 1.62 (d, 3H,  $J$  = 6.5 Hz), 1.63 (d, 3H,  $J$  = 6.5 Hz), 3.42 (brs, 1H), 3.79 (s, 3H), 3.81–3.86 (m, 5H), 3.88–3.93 (m, 1H), 4.28 (brd, 1H,  $J$  = 8.0 Hz), 4.47 (brd, 1H,  $J$  = 8.0 Hz), 4.92 (q, 2H,  $J$  = 6.5 Hz), 6.75 (s, 1H), 7.31 (s, 1H), 12.07 (s, 1H), 12.91 (s, 1H);

$^{13}\text{C}$  NMR ( $\text{CDCl}_3$ , 125 MHz)  $\delta$  18.5, 18.6, 19.1, 19.3, 56.5, 56.6, 66.8, 67.17, 67.20, 67.3, 67.5, 67.8, 103.3, 104.6, 109.7, 110.4, 117.0, 119.5, 130.3, 132.2, 141.2, 141.8, 147.3, 148.1, 161.1, 162.5, 164.3, 165.5, 185.6, 185.7, 187.1, 187.3;

HRMS (MALDI) calcd for  $\text{C}_{32}\text{H}_{30}\text{O}_{12}\text{Na}$   $[\text{M}+\text{Na}]^+$   $m/z$  629.1630; found  $m/z$  629.1616;

Mp 105–106 °C.

### 3-5. Preparation of **6**

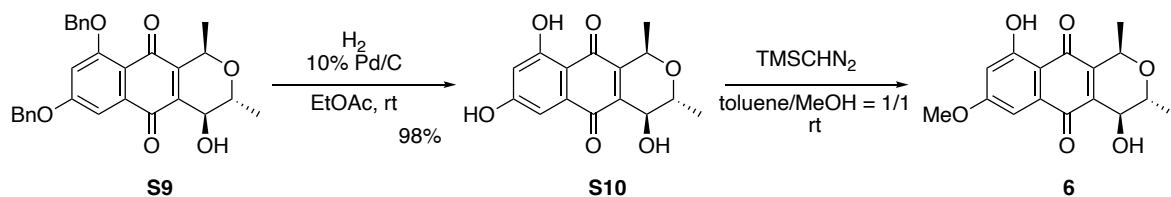

To a solution of pyranonaphthoquinone **S9**<sup>[4]</sup> (232 mg, 0.492 mmol) in EtOAc (25 mL) was added 10% Pd/C (28.0 mg, 26.3  $\mu$ mol) at room temperature. After stirring for 11 h under hydrogen atmosphere, the reaction was filtered through a short pad of silica gel on Celite<sup>®</sup> and washed with CH<sub>2</sub>Cl<sub>2</sub>. The filtrate was concentrated in vacuo to afford the compound **S10** (140 mg, 98%) as red solids.

To a solution of compound **S10** (160 mg, 0.551 mmol) in toluene/MeOH (11 mL/11 mL) was added trimethylsilyldiazomethane (0.6 M in THF, 8.5 mL, 5.1 mmol) at room temperature. After stirring for 4 h, the reaction was quenched by adding AcOH (300  $\mu$ L) at this temperature. Concentration and purification by silica gel column chromatography (*n*-hexane/Acetone = 9/1) afforded compound **6** (90.9 mg, 54%) as yellow solids.

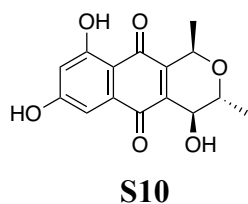

*R<sub>f</sub>* 0.48 (*n*-hexane/acetone = 6/4);

$[\alpha]_D^{22}$  -27.0 (*c* 0.43, CHCl<sub>3</sub>);

IR (ATR) 3235, 2979, 1608, 1269, 1178, 1067, 854, 763, 629 cm<sup>-1</sup>;

<sup>1</sup>H NMR (CDCl<sub>3</sub>, 500 MHz)  $\delta$  1.41 (d, 3H, *J* = 6.1 Hz), 1.62 (d, 3H, *J* = 6.9 Hz), 3.86 (brs, 1H), 3.89 (dq, 1H, *J* = 8.1, 6.1 Hz), 4.44 (d, 1H, *J* = 8.1 Hz), 4.92 (q, 1H, *J* = 6.9 Hz), 6.32 (brs, 1H), 6.61 (d, 1H, *J* = 2.4 Hz), 7.06 (d, 1H, *J* = 2.4 Hz), 12.06 (s, 1H);

<sup>13</sup>C NMR (CDCl<sub>3</sub>, 125 MHz)  $\delta$  18.6, 19.1, 67.11, 67.12, 67.8, 108.6, 108.8, 109.6, 133.5, 140.8, 148.5, 162.8, 164.5, 185.2, 186.5;

HRMS (CI) calcd for C<sub>15</sub>H<sub>15</sub>O<sub>6</sub> [M+H]<sup>+</sup> *m/z* 291.0863; found *m/z* 291.0870;

Mp 107–108 °C.

### 3-6. Silica gel-induced degradation of **4b**

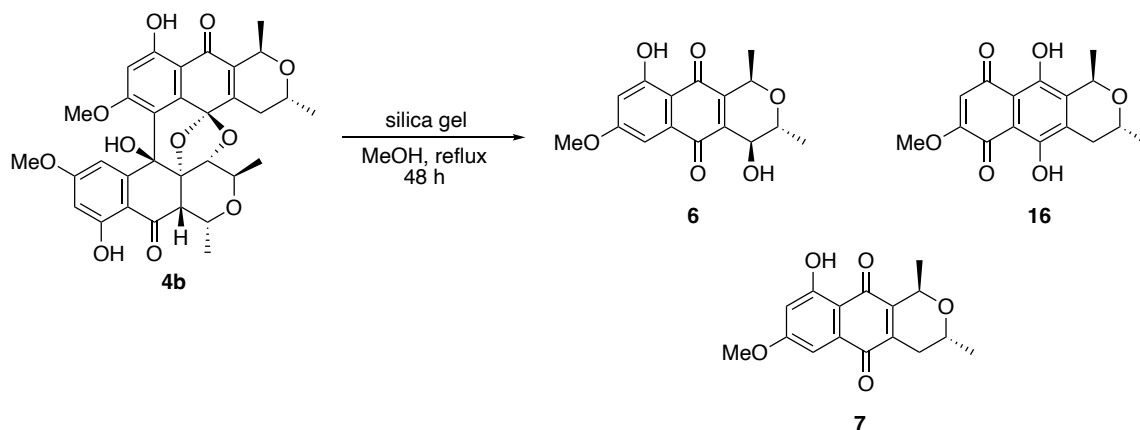

To a solution of compound **4b** (44.5 mg, 75.1  $\mu\text{mol}$ ) in MeOH (38 mL) was added silica gel (4.06 g; dried with a heat gun under vacuum). After stirring for 48 h under reflux, the suspension was filtered through a Celite<sup>®</sup> pad, and washed with EtOAc. The filtrate was concentrated and purified by silica gel column chromatography (*n*-hexane/EtOAc = 5/1  $\rightarrow$  2/1) to afford the compounds **6** (1.0 mg, 2%) as yellow solids, **7** (8.5 mg, 24%) as yellow solids, and **16** (8.0 mg, 22%) as red solids.

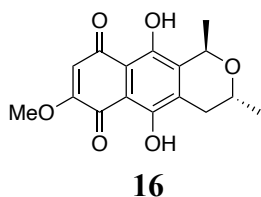

$R_f$  0.35 (*n*-hexane/EtOAc = 2/1);

$[\alpha]_D^{22} +90.4$  (*c* 0.65, CHCl<sub>3</sub>);

IR (ATR) 2973, 2936, 1596, 1439, 1387, 1298, 1238, 1202, 1106, 1055, 990, 966, 856, 811, 753, 708, 645, 600, 492, 445 cm<sup>-1</sup>;

<sup>1</sup>H NMR (CDCl<sub>3</sub>, 500 MHz)  $\delta$  1.38 (d, 3H,  $J$  = 6.1 Hz), 1.59 (d, 3H,  $J$  = 6.7 Hz), 2.37 (dd, 1H,  $J$  = 10.5 Hz, 18.4 Hz), 2.87 (dd, 1H,  $J$  = 3.4 Hz, 18.4 Hz), 3.94 (s, 3H), 4.06 (ddq, 1H,  $J$  = 3.4 Hz, 10.5 Hz, 6.1 Hz), 5.15 (q, 1H,  $J$  = 6.7 Hz), 6.18 (s, 1H), 12.72 (s, 1H), 13.17 (s, 1H);

<sup>13</sup>C NMR (CDCl<sub>3</sub>, 125 MHz)  $\delta$  19.2, 21.7, 30.0, 56.7, 62.1, 68.1, 107.7, 109.6, 109.8, 135.0, 142.7, 157.7, 160.5, 160.6, 178.5, 184.9;

HRMS (CI) calcd for C<sub>16</sub>H<sub>16</sub>O<sub>6</sub> [M]<sup>+</sup>  $m/z$  304.0947; found  $m/z$  304.0947;

Mp 187–188 °C.



### 3-7. Silica gel-induced degradation of **4a**

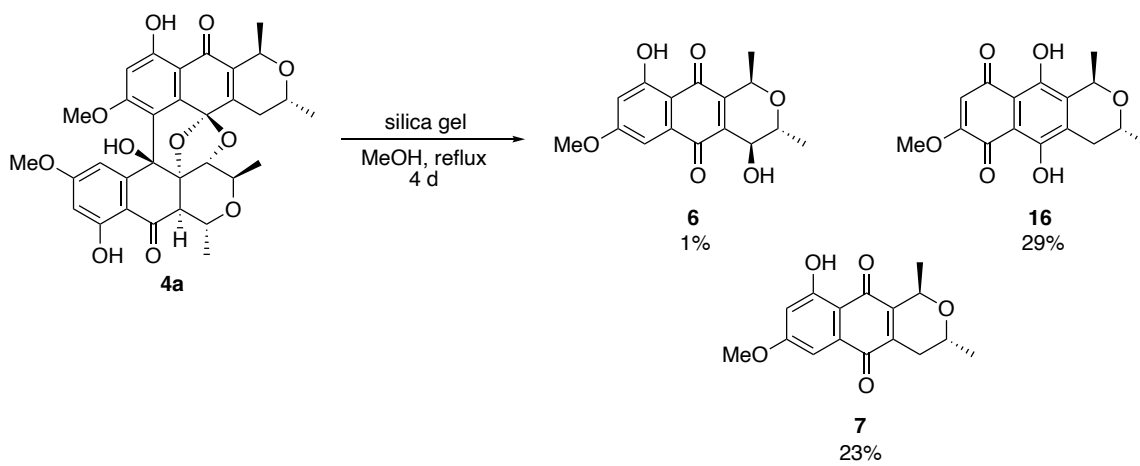

## 4. Mechanistic study

### 4-1. Silica gel-induced degradation of **5b** in methanol-*d*<sub>4</sub>.

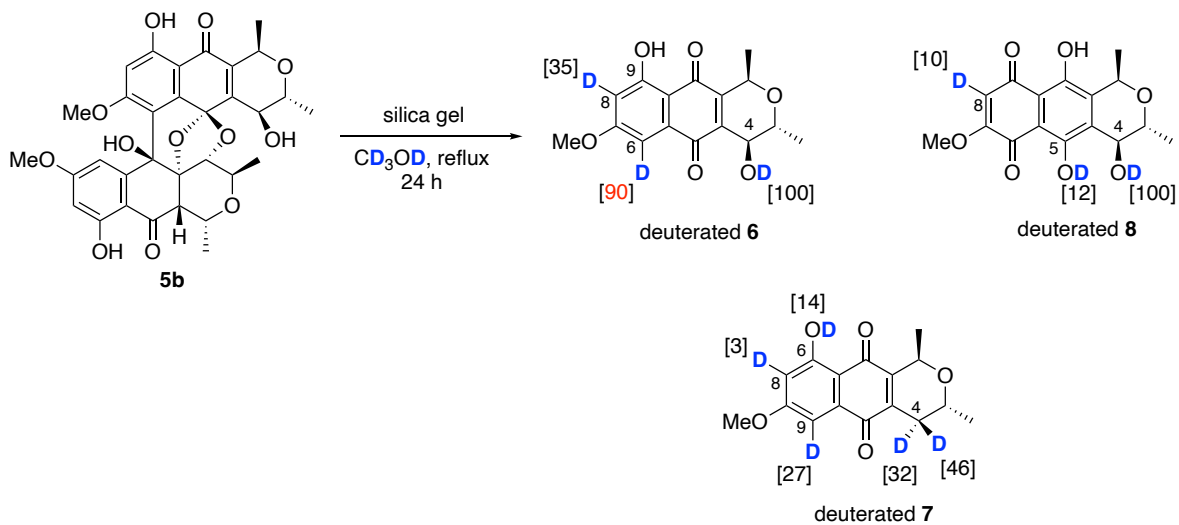

To a solution of compound **5b** (14.4 mg, 23.7  $\mu\text{mol}$ ) in CD<sub>3</sub>OD (12 mL) was added silica gel (1.28 g; dried with a heat gun under vacuum). After stirring for 24 h under reflux, the suspension was filtered through a Celite<sup>®</sup> pad, and washed with EtOAc. The filtrate was concentrated and purified by silica gel column chromatography (*n*-hexane/EtOAc = 5/1  $\rightarrow$  3/1  $\rightarrow$  2/1  $\rightarrow$  1/1) to afford the deuterated compounds **6** (4.3 mg, 30%) as yellow solids, **7** (0.4 mg, 3%) as yellow solids, and **8** (3.2 mg, 21%) as red solids.

## 5. UV–Vis spectra

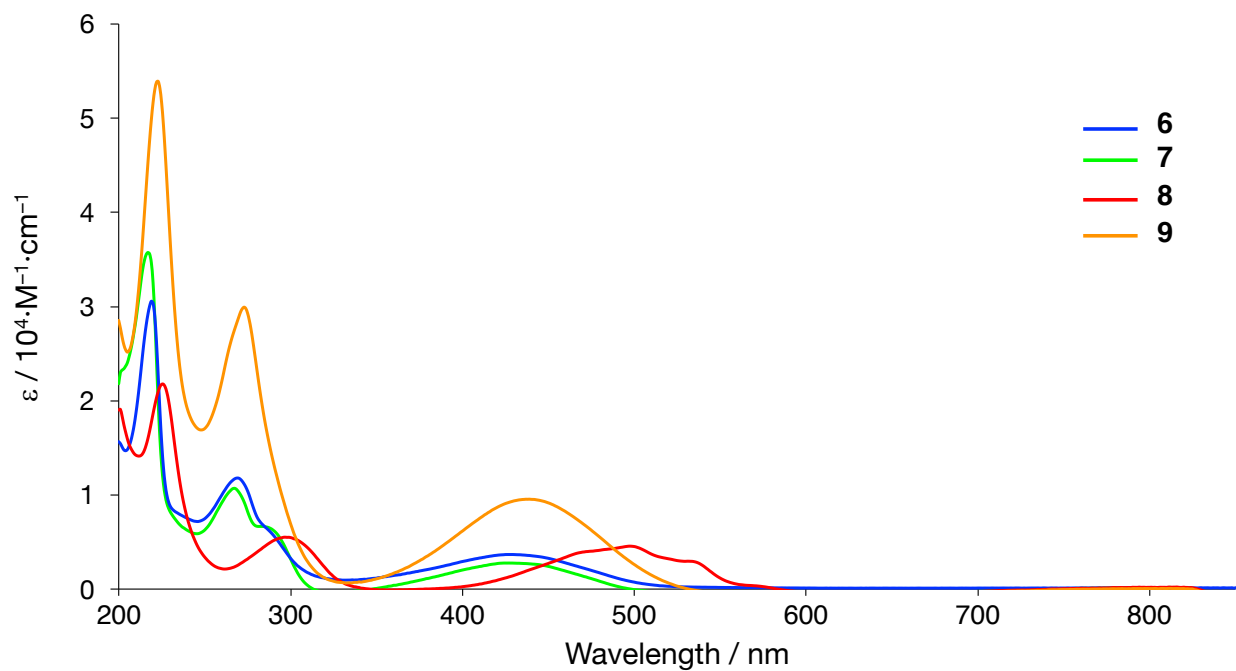

Figure S2. UV–Vis spectra (MeOH,  $2.0 \times 10^{-5}$  M).

|          | $\lambda_{\text{max}}$ nm (log $\epsilon$ )               |
|----------|-----------------------------------------------------------|
| <b>6</b> | 269 (4.07), 429 (3.57)                                    |
| <b>7</b> | 297 (3.74), 498 (3.66), 531 (3.47) 267 (4.03), 427 (3.45) |
| <b>8</b> | 297 (3.74), 498 (3.66), 531 (3.47)                        |
| <b>9</b> | 273 (4.48), 439 (3.98)                                    |

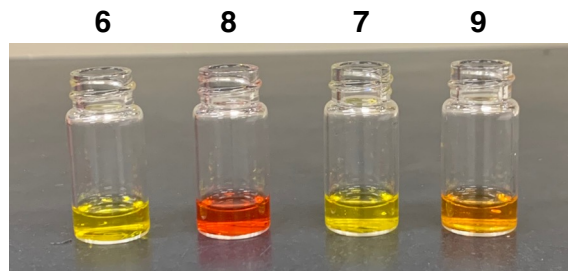

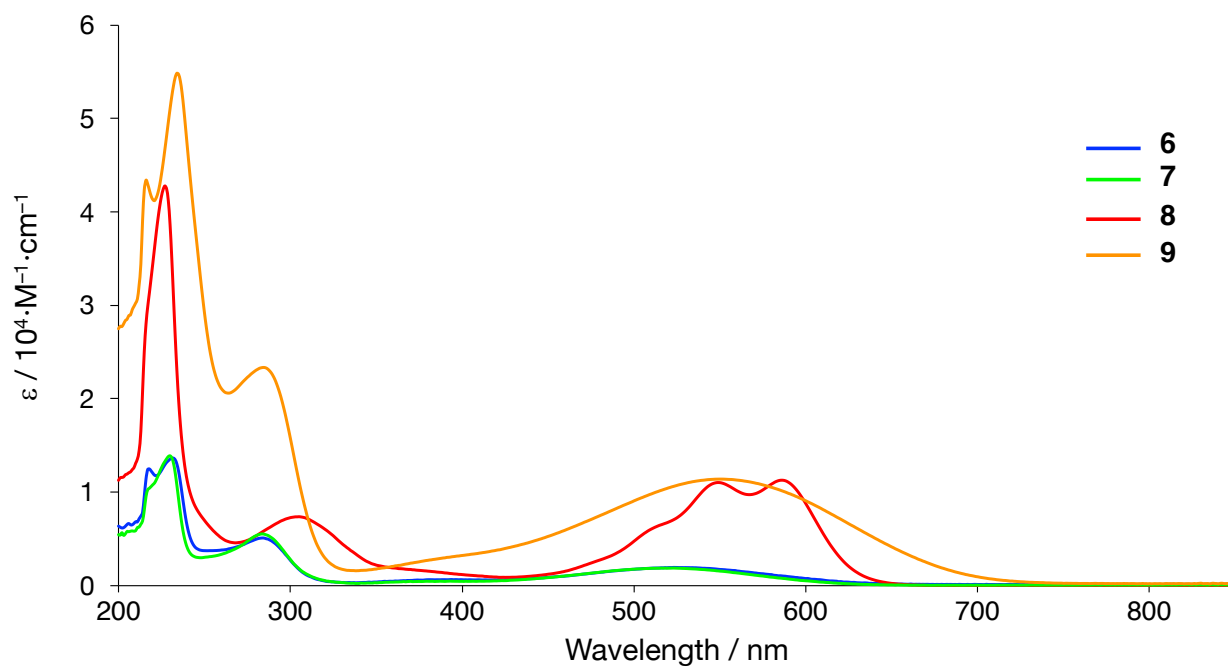

Figure S3. UV-Vis spectra (0.09 M NaOH/MeOH,  $2.0 \times 10^{-5}$  M).

|          | $\lambda_{\max}$ nm (log $\epsilon$ ) |
|----------|---------------------------------------|
| <b>6</b> | 284 (3.71), 523 (3.29)                |
| <b>7</b> | 284 (3.74), 523 (3.27)                |
| <b>8</b> | 305 (3.87), 549 (4.04), 586 (4.05)    |
| <b>9</b> | 284 (4.37), 550 (4.06)                |

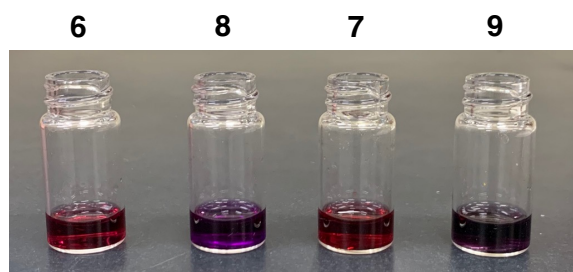

## 6. <sup>1</sup>H and <sup>13</sup>C NMR spectra

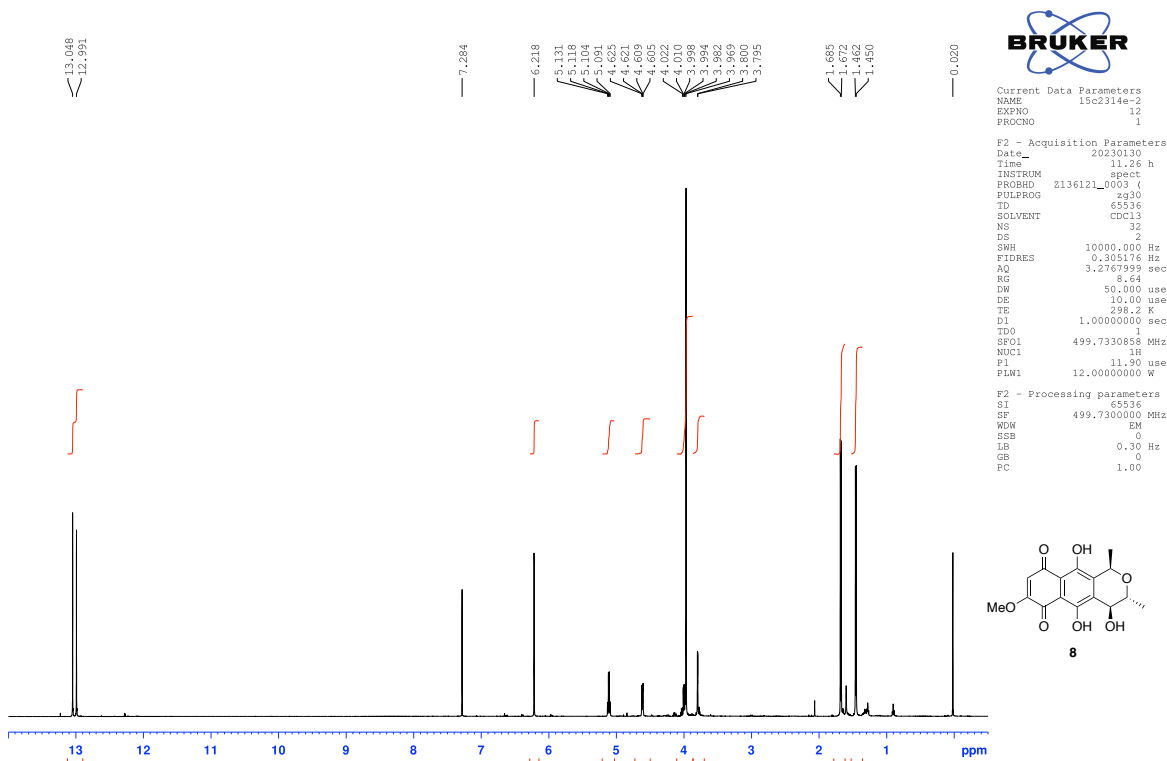

Figure S4. <sup>1</sup>H NMR spectrum of **8** (500 MHz, CDCl<sub>3</sub>).

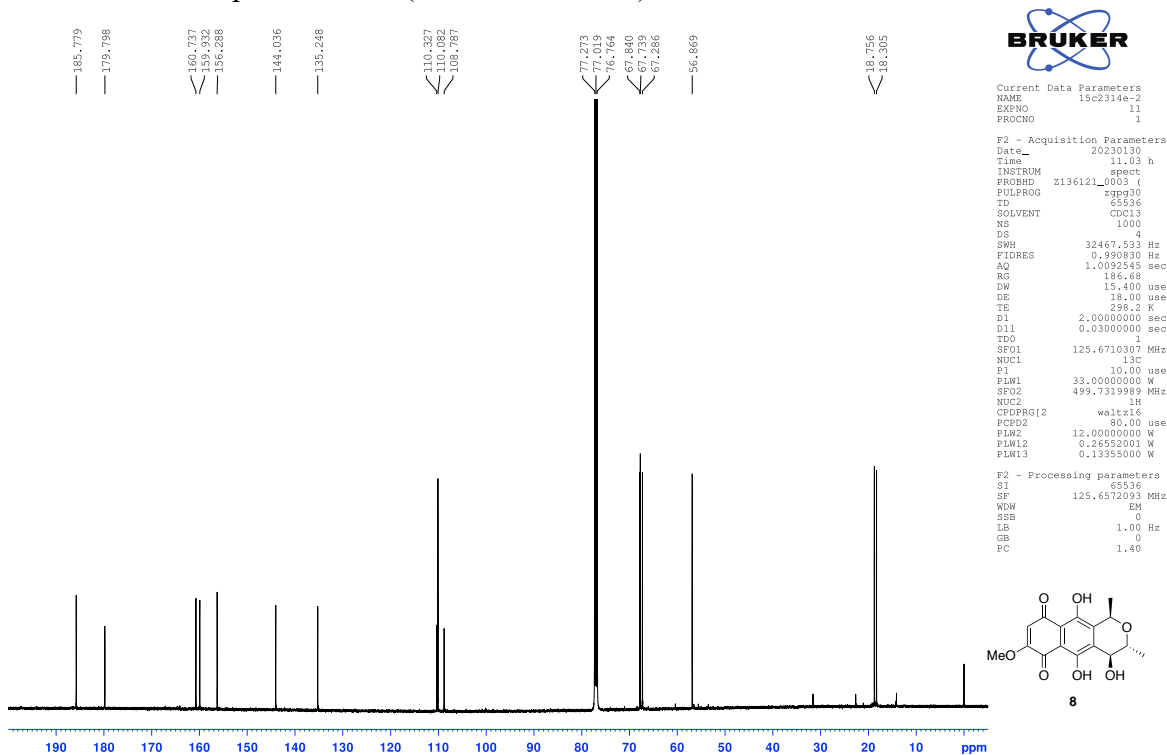

Figure S5. <sup>13</sup>C NMR spectrum of **8** (125 MHz, CDCl<sub>3</sub>).

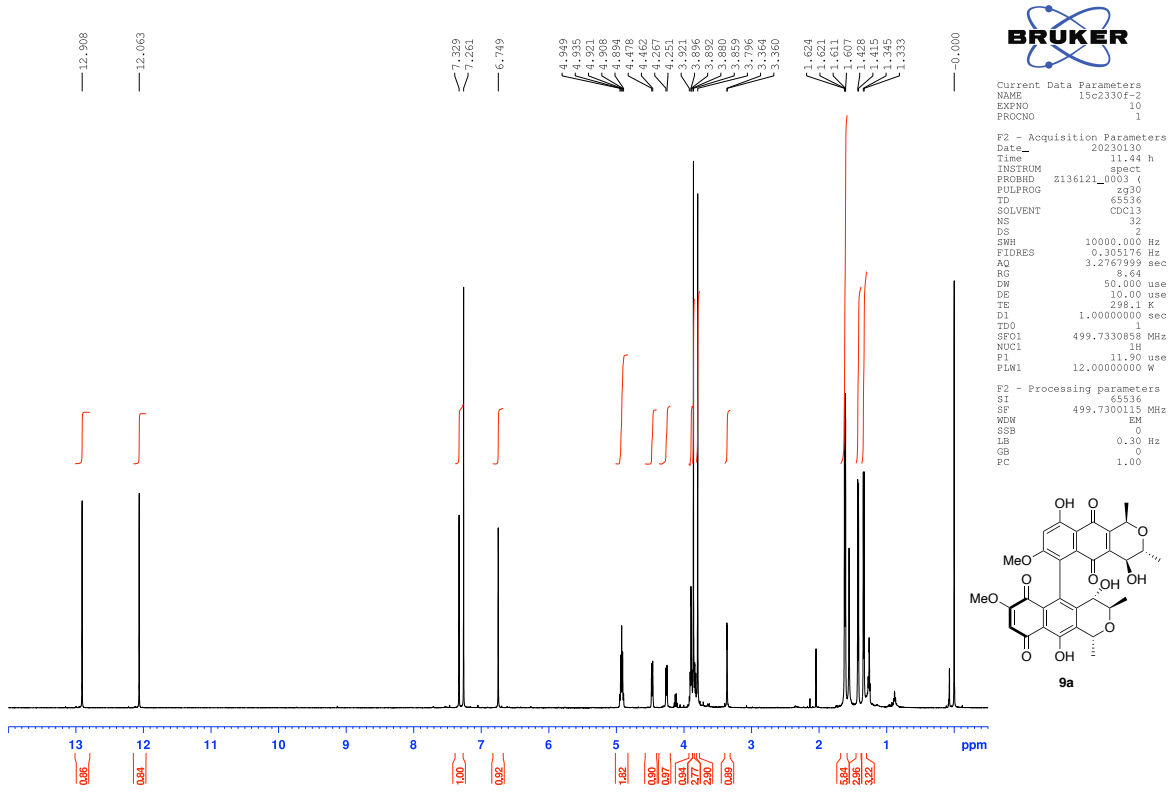

Figure S6.  $^1\text{H}$  NMR spectrum of **9a** (500 MHz,  $\text{CDCl}_3$ ).

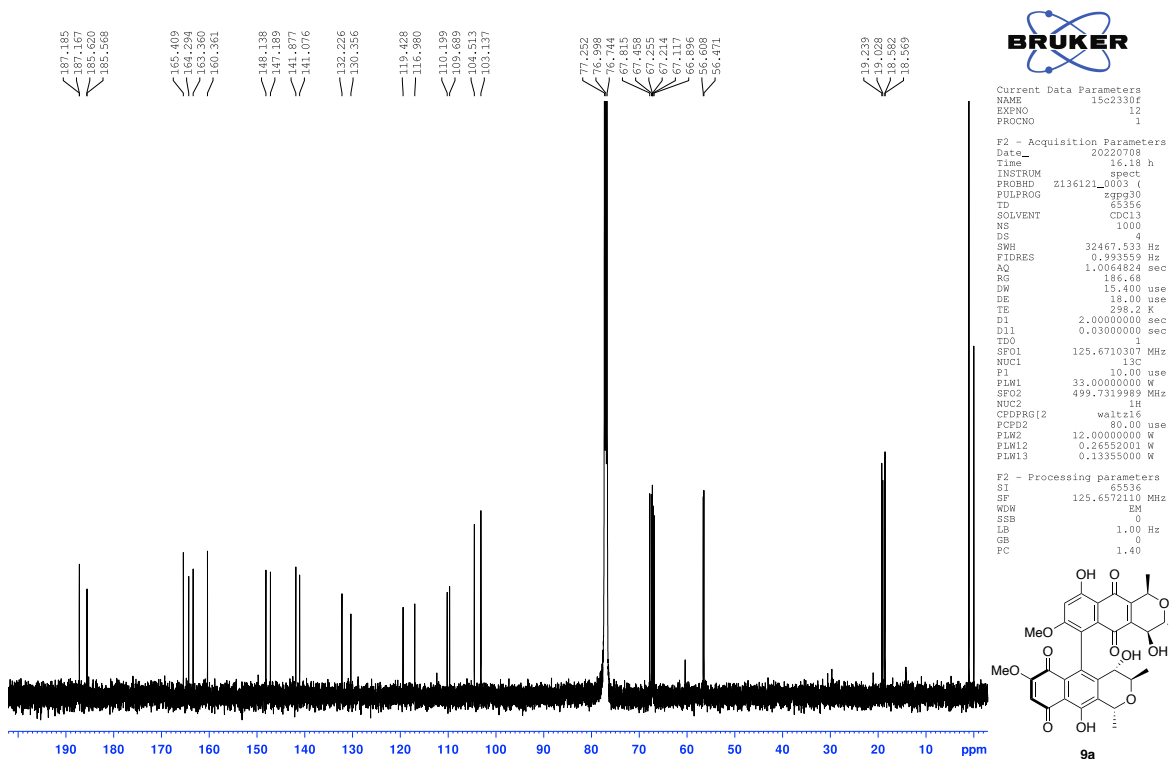

Figure S7.  $^{13}\text{C}$  NMR spectrum of **9a** (125 MHz,  $\text{CDCl}_3$ ).

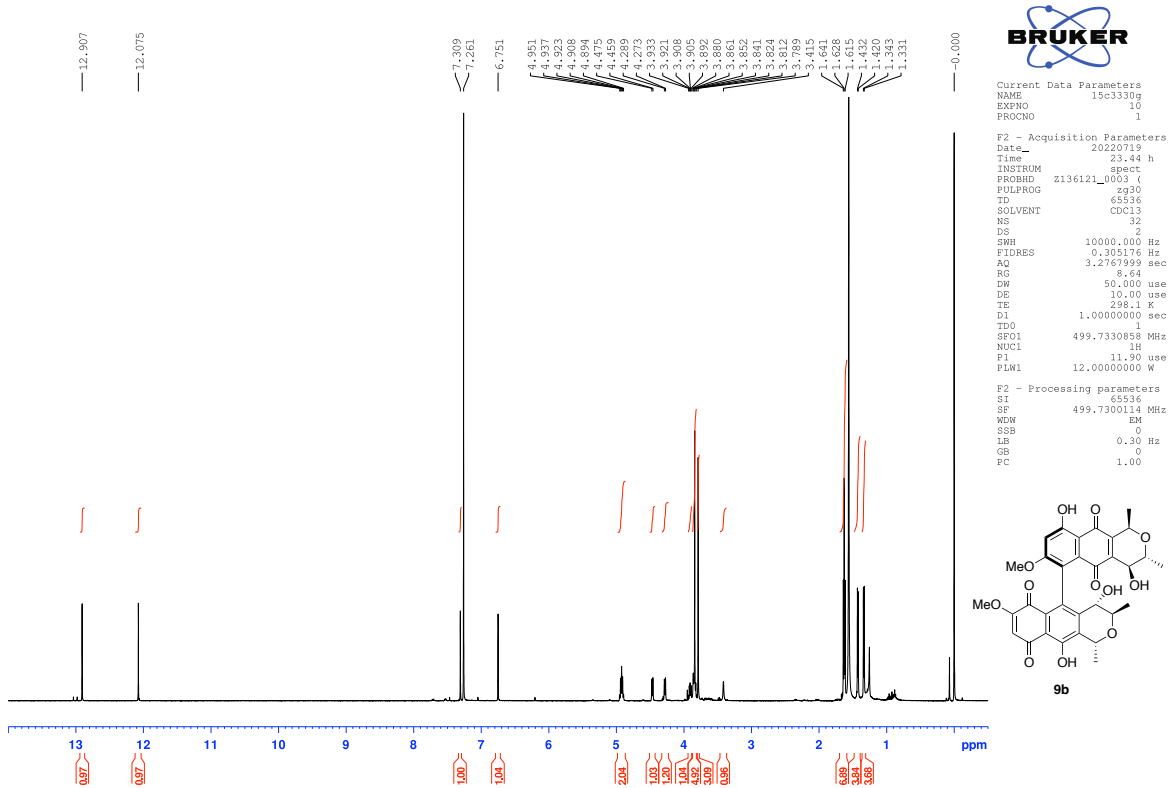

Figure S8. <sup>1</sup>H NMR spectrum of **9b** (500 MHz, CDCl<sub>3</sub>).

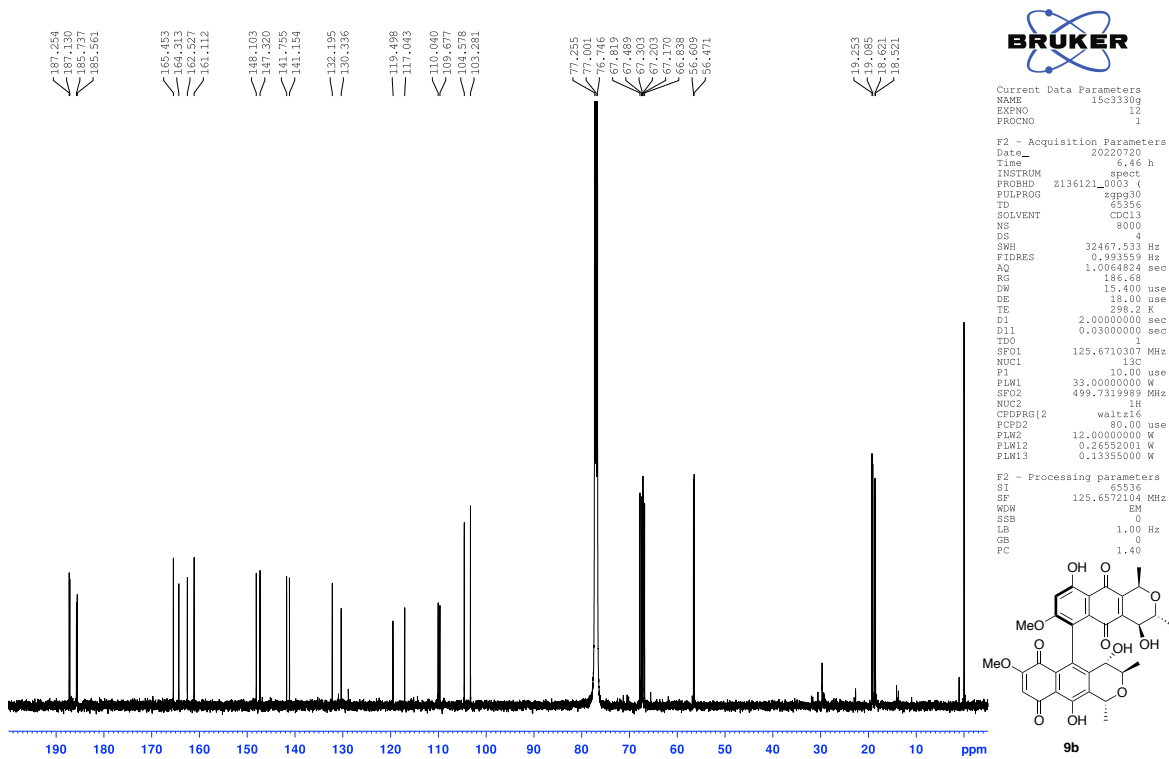

Figure S9. <sup>13</sup>C NMR spectrum of **9b** (125 MHz, CDCl<sub>3</sub>).

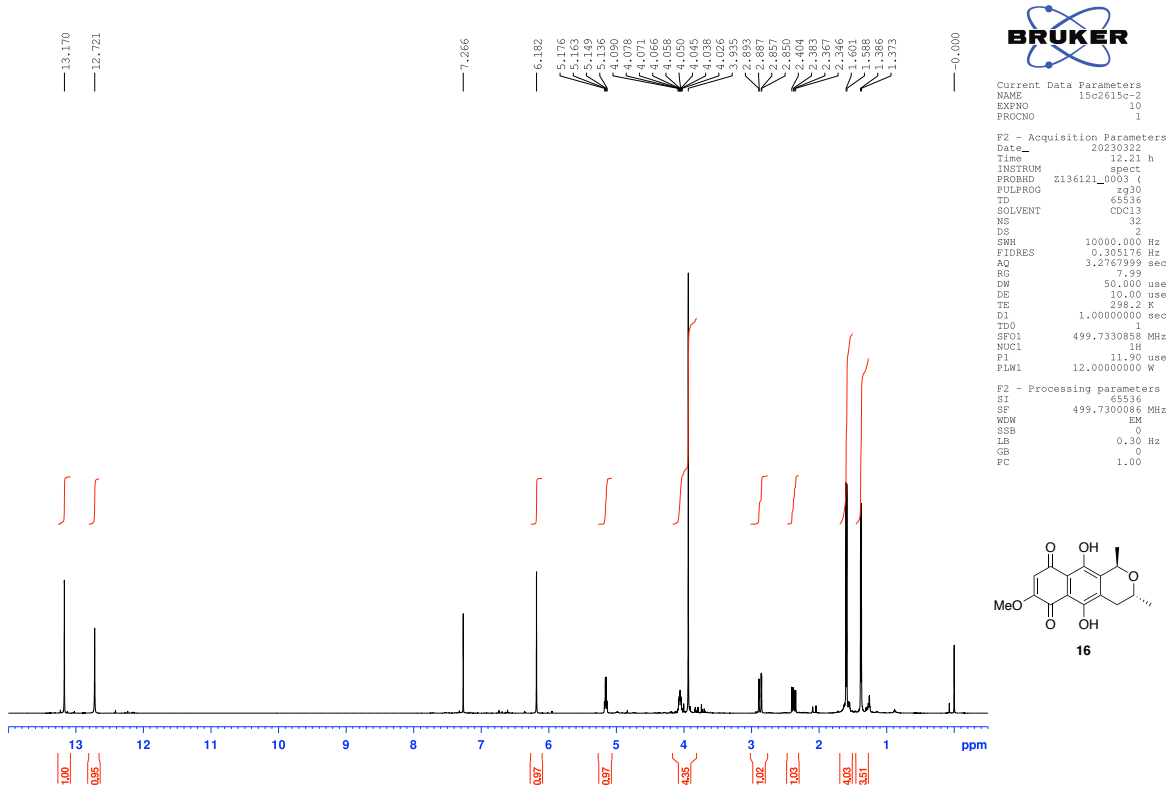

Figure S10. <sup>1</sup>H NMR spectrum of **16** (500 MHz, CDCl<sub>3</sub>).

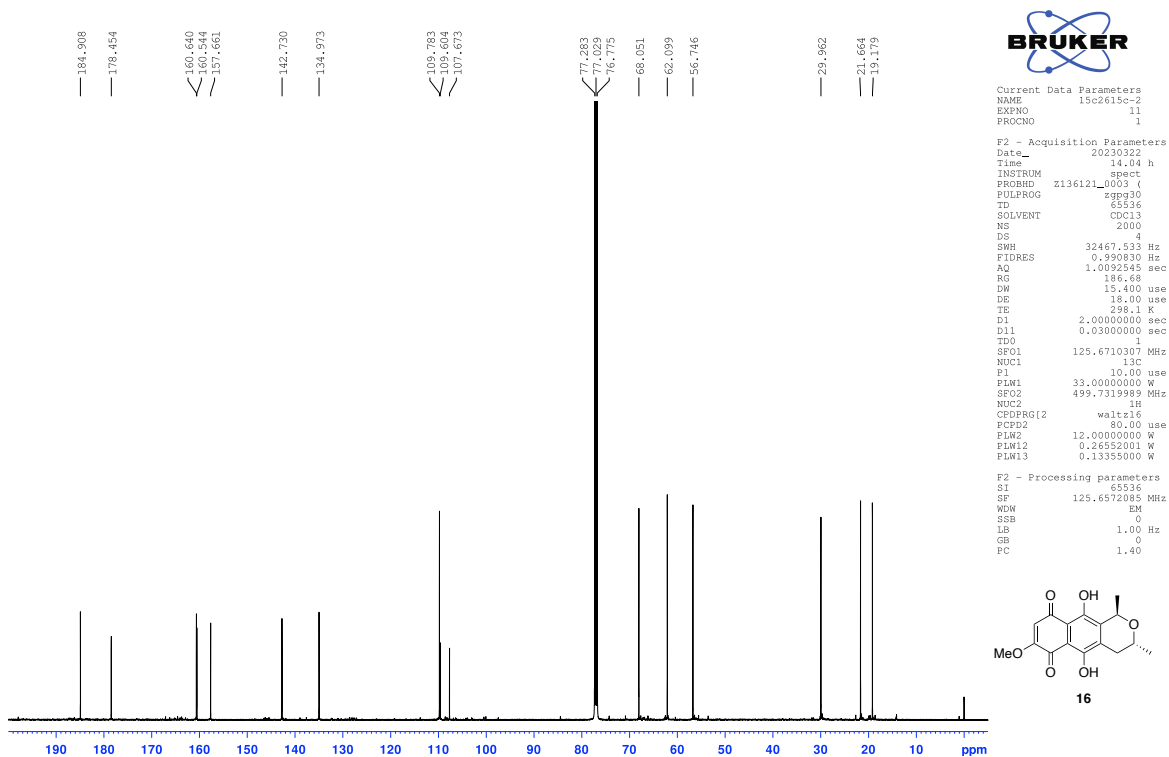

Figure S11. <sup>13</sup>C NMR spectrum of **16** (125 MHz, CDCl<sub>3</sub>).



## 7. Reference

1. D. W. Cameron, A. G. Riches, A. G. *Aust. J. Chem.* 1997, **50**, 409.
2. M. Horikawa, T. Hashimoto, Y. Asakawa, S. Takaoka, M. Tanaka, H. Kaku, T. Nishii, K. Yamaguchi, H. Masu, M. Kawase, S. Suzuki, M. Sato, T. Tsunoda, *Tetrahedron* 2006, **62**, 9072.
3. C. Ozakai, K. Kitamura, M. Horikawa, T. Hoshiyama, A. Imamura, T. Yoneyama, A. Umeyama, M. Noji, T. Tsunoda, H. Kaku, *New J. Chem.* 2022, **46**, 2600.
4. K. Kitamura, H. Kanagawa, C. Ozakai, T. Nishimura, H. Tokuda, T. Tsunoda, H. Kaku, *Synthesis* 2021, **53**, 1629.
